# Supplementary material for: Genetic Variants Associated with Neuropeptide Y Autoantibody Levels in Newly Diagnosed Individuals with Type 1 Diabetes
Source: MDPI journal article supplement (doi:10.3390/genes13050869), 2022-05-12
Supplement: s1 [file s1]

### Supplementary Materials:

**Table S1.** Population distribution of individuals genotyped using the two platforms i.e Immunochip and Global Screening Array (GSA).

| Population              | Immunochip | GSA |
|-------------------------|------------|-----|
| <b>Danish</b>           | 468        | 68  |
| <b>European/Turkish</b> | 11         | 2   |
| <b>Other</b>            | 7          | 4   |
| <b>Total</b>            | 479        | 70  |

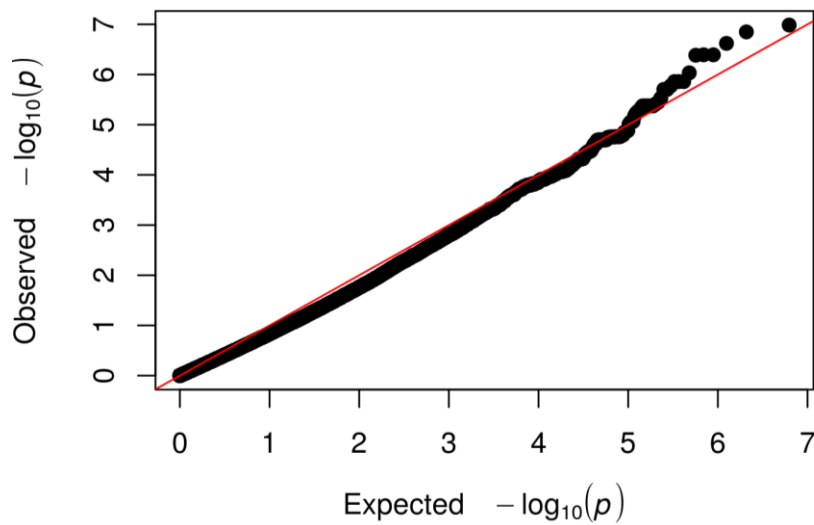

**Figure S1:** GC corrected QQ-plot.

**Table S3:** Top molecules from the IPA pathway analysis of the 348 top annotated SNPs. Genes in bold correspond to genes with SNPs mapping to eQTL or in association with NPY-LA. *Abbreviations:* IPA, Ingenuity Pathway Analysis; SNPs, Single nucleotide polymorphisms; NPY-LA, Neuropeptide Y autoantibodies; FXR, nuclear receptor Farnesoid X Receptor; RXR, retinoid X receptor; eQTL, quantitative trait loci.

| Gene Symbol  | Gene Name                         | SNP       | Bonferroni            | Molecular and biological function                                                                                                                                                                                                                                                                                             |
|--------------|-----------------------------------|-----------|-----------------------|-------------------------------------------------------------------------------------------------------------------------------------------------------------------------------------------------------------------------------------------------------------------------------------------------------------------------------|
| <i>DGKH</i>  | diacylglycerol kinase eta         | rs2148655 | $8.32 \times 10^{-8}$ | Diacylglycerol kinase (DGK) enzyme family regulates intracellular concentrations of phosphatidic acid and diacylglycerol, promoting cell growth by activating the Ras/B-Raf/C-Raf/MEK/ERK signaling pathway. <i>DGKH</i> is a protein-coding gene, nucleotide binding, enables NAD+ kinase activity, and enables ATP binding. |
| <i>DCAF5</i> | DDB1 and CUL4 associated factor 5 | rs1275406 | $1.57 \times 10^{-6}$ | Substrate receptor for CUL4-DDB1 E3 ubiquitin-protein ligase complex. <i>DCAF5</i> affects post-translational protein modification and is a protein-coding gene.                                                                                                                                                              |

|                                     |                                                        |             |                        |                                                                                                                                                                                                                                    |
|-------------------------------------|--------------------------------------------------------|-------------|------------------------|------------------------------------------------------------------------------------------------------------------------------------------------------------------------------------------------------------------------------------|
| <i>LRP1B</i>                        | LDL receptor related protein 1B                        | rs6755822   | 5.05 ×10 <sup>-6</sup> | Enables low-density lipoprotein particle receptor activity.                                                                                                                                                                        |
| <i>SND1</i>                         | staphylococcal nuclease and tudor domain containing 1  | rs3757779   | 7.99 ×10 <sup>-6</sup> | Endonuclease that mediates miRNA decay of both protein-free and AGO2-loaded miRNAs, bridging factor between STAT6 and the basal transcription factor.                                                                              |
| <i>LOC105373781</i>                 | uncharacterized                                        | rs1483242   | 8.88 ×10 <sup>-6</sup> | Affiliated with the ncRNA class.                                                                                                                                                                                                   |
| <i>FAM230E</i><br>(includes others) | family with sequence similarity 230 member             | rs375428700 | 1.24 ×10 <sup>-5</sup> | Affiliated with the lncRNA class.                                                                                                                                                                                                  |
| <i>LOC105373720</i>                 | uncharacterized                                        | rs1483242   | 8.88 ×10 <sup>-6</sup> |                                                                                                                                                                                                                                    |
| <i>TBR1</i>                         | T-box brain transcription factor 1                     | rs890076    | 1.62 ×10 <sup>-5</sup> | A member of a conserved family of genes that share the common T-box DNA-binding domain. T-box genes encode transcription factors involved in the regulation of numerous developmental processes.                                   |
| <i>CAPZA1</i>                       | capping actin protein of muscle Z-line subunit alpha 1 | rs12566829  | 1.66 ×10 <sup>-5</sup> | Actin cytoskeleton organization and endoplasmic reticulum to Golgi vesicle-mediated transport.                                                                                                                                     |
| <i>PABPC1L</i>                      | poly(A) binding protein cytoplasmic 1 like             | rs3746583   | 1.96 ×10 <sup>-5</sup> | Binds to the polyA tails of mRNAs to regulate mRNA stability and translation.                                                                                                                                                      |
| <i>ABCC2</i>                        | ATP binding cassette subfamily C member 2              | rs79095830  | 2.02 ×10 <sup>-5</sup> | ATP-dependent transporter of the ATP-binding cassette (ABC) family that binds and hydrolyzes ATP to enable active transport of various substrates including many drugs, toxicants, and endogenous compounds across cell membranes. |
