# Supplementary material for: Genetic Variants Associated with Neuropeptide Y Autoantibody Levels in Newly Diagnosed Individuals with Type 1 Diabetes
Source: Genes (Basel). 2022 May 12;13(5):869. doi: 10.3390/genes13050869 (PMC9142038; doi:10.3390/genes13050869)
Supplement: Supplementary file 1 [file genes-13-00869-s001.zip › Supplementary TableS2_new.xlsx]

## Sheet: 348_top_EUR
CHR	SNP	BP	A1	A2	MAF	TEST	NMISS	BETA	P	Imputation status	INFO
+	rs2148655	42640069	T	C	0.3452	ADD	546	1.454	8.32 X 10-8	Imputed	0.731
4	rs6448501	27188819	C	T	0.07832	ADD	546	2.759	1.73 X 10-7	Imputed	0.687
4	rs12508379	27172452	A	G	0.1175	ADD	546	2.206	3.69 X 10-7	Imputed	0.579
4	rs185335076	27163080	T	C	0.06648	ADD	546	2.847	4.31 X 10-7	Imputed	0.796
4	rs13132147	27166830	G	C	0.0929	ADD	546	2.391	9.15 X 10-7	Imputed	0.745
4	rs35956129	27166974	A	G	0.0929	ADD	546	2.391	9.15 X 10-7	Imputed	0.738
14	rs1275406	69592739	G	A	0.1293	ADD	546	1.812	1.57 X 10-6	Imputed	0.792
4	rs7684596	27215165	G	A	0.06284	ADD	546	2.81	2.43 X 10-6	Imputed	0.547
4	rs7684597	27215170	G	A	0.06284	ADD	546	2.81	2.43 X 10-6	Imputed	0.547
4	rs7684611	27215189	G	A	0.06284	ADD	546	2.81	2.43 X 10-6	Imputed	0.547
4	rs13126287	27173589	A	G	0.1712	ADD	546	1.824	2.49 X 10-6	Imputed	0.543
4	rs7662307	27215179	T	C	0.102	ADD	546	2.264	3.28 X 10-6	Imputed	0.785
4	rs7684256	27215177	C	A	0.102	ADD	546	2.264	3.28 X 10-6	Imputed	0.78
14	rs1275417	69617715	C	T	0.1548	ADD	546	1.577	5.04 X 10-6	Imputed	0.58
2	rs6755822	141014857	A	C	0.367	ADD	546	1.368	5.05 X 10-6	Imputed	0.719
2	rs10930018	162293403	A	G	0.2031	ADD	546	1.438	5.22 X 10-6	Imputed	0.846
2	rs4988784	162290504	C	T	0.2031	ADD	546	1.438	5.22 X 10-6	Imputed	0.851
2	rs7581103	162292761	C	T	0.2031	ADD	546	1.438	5.22 X 10-6	Imputed	0.849
14	rs1275416	69612241	A	T	0.1485	ADD	546	1.626	6.06 X 10-6	Imputed	0.586
2	rs13425717	204865802	G	A	0.05738	ADD	546	2.312	6.41 X 10-6	GSA	1
14	rs1629783	69568156	C	G	0.1284	ADD	546	1.717	6.5 X 10-6	Imputed	0.782
2	rs565799514	161913674	G	A	0.051	ADD	546	2.79	7.05 X 10-6	Imputed	0.461
2	rs10221696	162287804	G	A	0.204	ADD	546	1.417	7.15 X 10-6	Imputed	0.852
14	rs11158784	69553405	C	G	0.1475	ADD	546	1.574	7.19 X 10-6	Imputed	0.823
14	rs11158785	69553420	T	C	0.1475	ADD	546	1.574	7.19 X 10-6	Imputed	0.824
14	rs11628126	69565193	T	G	0.1475	ADD	546	1.574	7.19 X 10-6	Imputed	0.823
14	rs1626122	69567189	T	A	0.1475	ADD	546	1.574	7.19 X 10-6	Imputed	0.824
14	rs1710990	69575054	A	G	0.1475	ADD	546	1.574	7.19 X 10-6	Imputed	0.824
14	rs9323521	69553127	A	G	0.1475	ADD	546	1.574	7.19 X 10-6	Imputed	0.824
7	rs3757779	127445401	G	A	0.05738	ADD	546	2.65	7.99 X 10-6	Imputed	0.668
7	rs558157050	127460155	A	G	0.05829	ADD	546	2.65	7.99 X 10-6	Imputed	0.751
2	rs12616889	141017287	G	T	0.3625	ADD	546	1.327	8.11 X 10-6	Imputed	0.771
2	rs532444777	162144943	T	C	0.05009	ADD	546	2.779	8.88 X 10-6	Imputed	0.455
2	rs1483242	186044627	A	G	0.4818	ADD	546	-1.187	8.88 X 10-6	ImmunoChip	1
2	rs56137845	186056401	A	T	0.4818	ADD	546	-1.187	8.88 X 10-6	Imputed	0.999
2	rs56259029	186052539	A	C	0.4818	ADD	546	-1.187	8.88 X 10-6	Imputed	1
2	rs62199977	186055665	G	C	0.4818	ADD	546	-1.187	8.88 X 10-6	ImmunoChip	1
2	rs6724681	186049966	A	G	0.4818	ADD	546	-1.187	8.88 X 10-6	ImmunoChip	1
2	rs74393351	186057716	G	A	0.4818	ADD	546	-1.187	8.88 X 10-6	Imputed	0.999
13	rs144030106	42643367	C	T	0.2523	ADD	546	1.219	9.74 X 10-6	Imputed	0.87
4	rs1488267	27209449	A	G	0.06648	ADD	546	2.498	9.93 X 10-6	Imputed	0.649
4	rs4692023	27211854	C	T	0.06648	ADD	546	2.498	9.93 X 10-6	Imputed	0.625
4	rs1948145	27202571	C	A	0.0674	ADD	546	2.469	1.12 X 10-5	Imputed	0.721
2	rs6711192	162352757	G	C	0.1976	ADD	546	1.408	1.16 X 10-5	Imputed	0.802
2	rs3849351	162350904	A	G	0.1985	ADD	546	1.407	1.17 X 10-5	Imputed	0.814
2	rs6717281	141018361	A	T	0.3643	ADD	546	1.303	1.2 X 10-5	Imputed	0.78
22	rs375428700	21682072	A	G	0.3051	ADD	546	1.445	1.24 X 10-5	Imputed	0.417
13	rs4398011	42641025	C	T	0.275	ADD	546	1.168	1.29 X 10-5	Imputed	0.846
2	rs10930021	162344247	C	T	0.1995	ADD	546	1.385	1.47 X 10-5	Imputed	0.816
2	rs12692634	162335792	C	T	0.1995	ADD	546	1.385	1.47 X 10-5	Imputed	0.816
2	rs12692635	162339940	A	G	0.1995	ADD	546	1.385	1.47 X 10-5	Imputed	0.816
2	rs13029783	162347038	A	T	0.1995	ADD	546	1.385	1.47 X 10-5	Imputed	0.815
2	rs34722451	162346545	A	T	0.1995	ADD	546	1.385	1.47 X 10-5	Imputed	0.815
2	rs3849348	162350566	C	T	0.1995	ADD	546	1.385	1.47 X 10-5	Imputed	0.818
2	rs3849349	162350750	A	C	0.1995	ADD	546	1.385	1.47 X 10-5	Imputed	0.815
2	rs3914095	162342499	C	G	0.1995	ADD	546	1.385	1.47 X 10-5	Imputed	0.816
2	rs4664425	162345193	G	T	0.1995	ADD	546	1.385	1.47 X 10-5	Imputed	0.815
2	rs6731432	162330234	A	G	0.1995	ADD	546	1.385	1.47 X 10-5	Imputed	0.816
2	rs890076	162280748	G	A	0.1749	ADD	546	1.604	1.63 X 10-5	Imputed	0.872
1	rs12566829	113186876	G	A	0.05738	ADD	546	2.723	1.66 X 10-5	Imputed	0.802
7	rs542864949	127238533	C	T	0.05373	ADD	546	2.66	1.8 X 10-5	Imputed	0.762
20	rs3746583	43565559	C	G	0.1485	ADD	546	1.56	1.96 X 10-5	Imputed	0.705
10	rs79095830	101547218	T	G	0.4126	ADD	546	1.083	2.02 X 10-5	Imputed	0.717
2	rs61406267	141030193	C	T	0.3506	ADD	546	1.317	2.13 X 10-5	Imputed	0.835
14	rs17105195	77499279	A	G	0.2969	ADD	546	-1.293	2.19 X 10-5	Imputed	0.725
1	rs12025785	113205367	T	C	0.05464	ADD	546	2.744	2.21 X 10-5	Imputed	0.754
6	rs1924663	3706705	T	A	0.2532	ADD	546	1.611	2.24 X 10-5	Imputed	0.439
2	rs527847446	41680233	C	T	0.1339	ADD	546	1.681	2.32 X 10-5	Imputed	0.891
10	rs11259742	5647078	T	C	0.0592	ADD	546	2.361	2.37 X 10-5	Imputed	0.777
2	rs28691865	141026374	A	T	0.3525	ADD	546	1.302	2.52 X 10-5	Imputed	0.831
2	rs2358143	162312632	C	T	0.204	ADD	546	1.312	2.62 X 10-5	Imputed	0.864
1	rs115377341	45970832	G	A	0.3306	ADD	546	-1.42	2.63 X 10-5	Imputed	0.493
7	rs2032956	52093913	A	C	0.0847	ADD	546	2.001	2.63 X 10-5	Imputed	0.598
7	rs2032957	52093966	C	T	0.0847	ADD	546	2.001	2.63 X 10-5	Imputed	0.597
2	rs1544857	162294541	C	G	0.2013	ADD	546	1.329	2.73 X 10-5	Imputed	0.86
2	rs918964	162296916	A	G	0.2013	ADD	546	1.329	2.73 X 10-5	Imputed	0.859
4	rs1488288	27200233	G	A	0.07104	ADD	546	2.309	2.74 X 10-5	Imputed	0.745
16	rs150334134	25073810	A	G	0.06831	ADD	546	2.417	2.88 X 10-5	Imputed	0.425
2	rs2171322	141040236	A	G	0.3361	ADD	546	1.344	2.91 X 10-5	Imputed	0.861
2	rs12469052	162319353	C	T	0.1903	ADD	546	1.329	3.03 X 10-5	Imputed	0.858
2	rs57419108	162311357	C	G	0.1903	ADD	546	1.329	3.03 X 10-5	Imputed	0.858
2	rs62188151	162309849	A	C	0.1903	ADD	546	1.329	3.03 X 10-5	Imputed	0.858
2	rs62188153	162313036	T	G	0.1903	ADD	546	1.329	3.03 X 10-5	Imputed	0.858
2	rs62188154	162313939	G	T	0.1903	ADD	546	1.329	3.03 X 10-5	Imputed	0.854
2	rs62188155	162315420	C	T	0.1903	ADD	546	1.329	3.03 X 10-5	Imputed	0.858
2	rs62190168	162322012	G	A	0.1903	ADD	546	1.329	3.03 X 10-5	Imputed	0.858
2	rs72877999	162320388	A	G	0.1903	ADD	546	1.329	3.03 X 10-5	Imputed	0.854
20	rs6138798	26085825	G	A	0.08015	ADD	546	2.203	3.05 X 10-5	Imputed	0.435
2	rs79046651	162326417	A	C	0.1894	ADD	546	1.335	3.06 X 10-5	Imputed	0.856
4	rs2309514	27216346	G	A	0.1466	ADD	546	1.715	3.28 X 10-5	Imputed	0.708
14	rs10498527	69549762	C	T	0.1585	ADD	546	1.409	3.3 X 10-5	Imputed	0.801
14	rs1105625	69549004	C	T	0.1585	ADD	546	1.409	3.3 X 10-5	Imputed	0.801
14	rs11158786	69553438	G	A	0.1585	ADD	546	1.409	3.3 X 10-5	Imputed	0.805
14	rs11158788	69571765	T	A	0.1585	ADD	546	1.409	3.3 X 10-5	Imputed	0.806
14	rs11158789	69572003	A	C	0.1585	ADD	546	1.409	3.3 X 10-5	Imputed	0.807
14	rs1147481	69597769	G	C	0.1585	ADD	546	1.409	3.3 X 10-5	Imputed	0.816
14	rs1275407	69593452	G	A	0.1585	ADD	546	1.409	3.3 X 10-5	Imputed	0.816
14	rs1275413	69595095	A	G	0.1585	ADD	546	1.409	3.3 X 10-5	Imputed	0.817
14	rs1275414	69606796	G	A	0.1585	ADD	546	1.409	3.3 X 10-5	Imputed	0.818
14	rs1275415	69611710	C	T	0.1585	ADD	546	1.409	3.3 X 10-5	Imputed	0.812
14	rs1710989	69581236	C	A	0.1585	ADD	546	1.409	3.3 X 10-5	Imputed	0.807
14	rs1892297	69588597	C	T	0.1585	ADD	546	1.409	3.3 X 10-5	Imputed	0.816
14	rs2001355	69561193	A	G	0.1585	ADD	546	1.409	3.3 X 10-5	Imputed	0.806
14	rs72673997	52077272	T	C	0.1056	ADD	546	1.92	3.3 X 10-5	Imputed	0.738
2	rs6432684	162309195	A	G	0.2049	ADD	546	1.29	3.33 X 10-5	Imputed	0.863
7	rs117269518	127557885	A	T	0.05373	ADD	546	2.546	3.33 X 10-5	Imputed	0.73
7	rs117376513	127561867	G	T	0.05373	ADD	546	2.546	3.33 X 10-5	Imputed	0.733
2	rs12463509	162347948	T	C	0.1831	ADD	546	1.372	3.41 X 10-5	Imputed	0.811
2	rs55906042	162344210	A	G	0.1831	ADD	546	1.372	3.41 X 10-5	Imputed	0.811
2	rs56384808	162347755	T	G	0.1831	ADD	546	1.372	3.41 X 10-5	Imputed	0.811
2	rs62188727	162334193	A	G	0.1831	ADD	546	1.372	3.41 X 10-5	Imputed	0.811
2	rs62188728	162335701	C	T	0.1831	ADD	546	1.372	3.41 X 10-5	Imputed	0.807
2	rs62188729	162337052	T	C	0.1831	ADD	546	1.372	3.41 X 10-5	Imputed	0.811
2	rs62188731	162344776	G	C	0.1831	ADD	546	1.372	3.41 X 10-5	Imputed	0.811
4	rs148802951	27175239	G	C	0.07377	ADD	546	2.249	3.51 X 10-5	Imputed	0.799
4	rs1488273	27180870	G	A	0.07377	ADD	546	2.249	3.51 X 10-5	Imputed	0.794
4	rs4692173	27186207	C	T	0.07377	ADD	546	2.249	3.51 X 10-5	Imputed	0.769
4	rs532041087	27184105	G	C	0.07377	ADD	546	2.249	3.51 X 10-5	Imputed	0.8
4	rs6834708	27191034	G	C	0.07377	ADD	546	2.249	3.51 X 10-5	Imputed	0.771
4	rs1906524	27199707	A	T	0.07286	ADD	546	2.258	3.54 X 10-5	Imputed	0.751
13	rs138051094	42651127	A	G	0.2614	ADD	546	1.127	3.57 X 10-5	Imputed	0.855
20	rs1937052	26080882	G	C	0.08197	ADD	546	2.142	3.58 X 10-5	Imputed	0.421
20	rs2721987	26083275	G	A	0.08197	ADD	546	2.142	3.58 X 10-5	Imputed	0.428
20	rs2950843	26083258	T	G	0.08197	ADD	546	2.142	3.58 X 10-5	Imputed	0.428
20	rs6115526	26087455	A	C	0.08197	ADD	546	2.142	3.58 X 10-5	Imputed	0.403
10	rs2380196	5637755	G	A	0.05373	ADD	546	2.772	3.67 X 10-5	Imputed	0.764
10	rs2380197	5637772	G	A	0.05373	ADD	546	2.772	3.67 X 10-5	Imputed	0.764
2	rs10469558	141023723	A	T	0.3716	ADD	546	1.222	3.68 X 10-5	Imputed	0.833
2	rs116560968	161922822	C	G	0.0592	ADD	546	2.419	3.75 X 10-5	Imputed	0.432
13	rs140719100	42627608	G	A	0.3388	ADD	546	1.103	3.83 X 10-5	Imputed	0.766
22	rs5746505	18518759	T	C	0.388	ADD	546	1.077	3.85 X 10-5	Imputed	0.695
2	rs199878970	162447745	G	A	0.1157	ADD	546	1.799	3.87 X 10-5	Imputed	0.746
2	rs372805744	162393344	G	T	0.123	ADD	546	1.739	3.87 X 10-5	Imputed	0.709
2	rs16845851	162295623	C	A	0.1876	ADD	546	1.331	3.91 X 10-5	Imputed	0.857
2	rs2194732	162289156	A	G	0.1876	ADD	546	1.331	3.91 X 10-5	Imputed	0.857
2	rs56121938	162297649	G	A	0.1876	ADD	546	1.331	3.91 X 10-5	Imputed	0.853
2	rs72877963	162288318	G	A	0.1876	ADD	546	1.331	3.91 X 10-5	Imputed	0.853
22	rs73394413	18517488	A	G	0.3825	ADD	546	1.069	3.97 X 10-5	Imputed	0.702
6	rs4959857	3714113	C	T	0.2113	ADD	546	1.437	4.06 X 10-5	Imputed	0.543
13	rs7328055	36420097	G	T	0.2495	ADD	546	-1.235	4.07 X 10-5	Imputed	0.97
13	rs9601455	36419961	T	C	0.2495	ADD	546	-1.235	4.07 X 10-5	Imputed	0.971
1	rs10157508	104474057	G	T	0.05373	ADD	546	2.595	4.08 X 10-5	Imputed	0.492
2	rs115562071	162493241	T	C	0.1157	ADD	546	1.774	4.14 X 10-5	Imputed	0.826
2	rs12470590	162493102	G	A	0.1157	ADD	546	1.774	4.14 X 10-5	Imputed	0.826
2	rs12473088	162485073	G	A	0.1157	ADD	546	1.774	4.14 X 10-5	Imputed	0.828
2	rs56371522	162491109	A	G	0.1157	ADD	546	1.774	4.14 X 10-5	Imputed	0.828
2	rs62187655	162487440	G	C	0.1157	ADD	546	1.774	4.14 X 10-5	Imputed	0.829
2	rs62187656	162487699	G	A	0.1157	ADD	546	1.774	4.14 X 10-5	Imputed	0.829
2	rs62187657	162488091	A	G	0.1157	ADD	546	1.774	4.14 X 10-5	Imputed	0.83
2	rs62187658	162488095	C	A	0.1157	ADD	546	1.774	4.14 X 10-5	Imputed	0.83
2	rs62188960	162492578	C	A	0.1157	ADD	546	1.774	4.14 X 10-5	Imputed	0.827
2	rs72877969	162291179	G	T	0.1894	ADD	546	1.314	4.18 X 10-5	Imputed	0.86
6	rs67629082	3707518	G	A	0.2505	ADD	546	1.561	4.18 X 10-5	Imputed	0.436
10	rs183240161	61100500	G	A	0.05738	ADD	546	2.4	4.26 X 10-5	Imputed	0.76
10	rs574508532	61103753	A	G	0.05738	ADD	546	2.4	4.26 X 10-5	Imputed	0.759
1	rs1796915	20260536	G	A	0.3807	ADD	546	-1.175	4.28 X 10-5	ImmunoChip	1
1	rs537375	87267670	A	G	0.05009	ADD	546	2.661	4.3 X 10-5	Imputed	0.865
22	rs9604911	18924956	G	T	0.3525	ADD	546	-1.01	4.36 X 10-5	Imputed	0.744
10	rs11006138	60168645	G	A	0.3024	ADD	546	1.264	4.39 X 10-5	Imputed	0.567
2	rs10202267	162366126	T	A	0.1375	ADD	546	1.641	4.41 X 10-5	Imputed	0.721
2	rs13026747	162364504	G	T	0.1375	ADD	546	1.641	4.41 X 10-5	Imputed	0.721
2	rs3849353	162374138	G	C	0.1375	ADD	546	1.641	4.41 X 10-5	Imputed	0.721
2	rs7588198	162365202	G	T	0.1375	ADD	546	1.641	4.41 X 10-5	Imputed	0.721
2	rs7592112	162366517	C	G	0.1375	ADD	546	1.641	4.41 X 10-5	Imputed	0.721
2	rs7595197	162366835	G	T	0.1375	ADD	546	1.641	4.41 X 10-5	Imputed	0.721
10	rs181054632	65117751	A	G	0.1858	ADD	546	1.442	4.45 X 10-5	Imputed	0.706
2	rs10928746	141033378	T	C	0.3397	ADD	546	1.31	4.52 X 10-5	Imputed	0.849
2	rs12479163	141033205	A	G	0.3397	ADD	546	1.31	4.52 X 10-5	Imputed	0.849
2	rs55945474	141044952	G	T	0.3379	ADD	546	1.313	4.54 X 10-5	Imputed	0.864
2	rs62171603	141044968	A	G	0.3379	ADD	546	1.313	4.54 X 10-5	Imputed	0.861
2	rs12469977	162328814	T	C	0.1849	ADD	546	1.335	4.59 X 10-5	Imputed	0.825
4	rs12646573	45820185	G	C	0.2295	ADD	546	1.497	4.65 X 10-5	Imputed	0.475
14	rs80205618	77514704	A	G	0.2459	ADD	546	-1.305	4.74 X 10-5	Imputed	0.676
18	rs67685854	42715907	A	T	0.1357	ADD	546	1.575	4.88 X 10-5	Imputed	0.671
2	rs12470386	162289146	C	T	0.1885	ADD	546	1.357	4.93 X 10-5	Imputed	0.736
17	rs226241	37018869	G	C	0.2086	ADD	546	1.278	4.99 X 10-5	Imputed	0.748
10	rs11817729	61548177	A	G	0.08561	ADD	546	1.545	5.09 X 10-5	Imputed	0.904
13	rs74044478	41011315	C	T	0.05373	ADD	546	2.58	5.13 X 10-5	Imputed	0.73
14	rs1811269	77526603	T	C	0.2377	ADD	546	-1.33	5.22 X 10-5	Imputed	0.574
4	rs146308107	13957038	T	C	0.06375	ADD	546	2.361	5.23 X 10-5	Imputed	0.471
4	rs73798541	13959341	A	G	0.06375	ADD	546	2.361	5.23 X 10-5	Imputed	0.468
4	rs79172210	13956981	A	G	0.06375	ADD	546	2.361	5.23 X 10-5	Imputed	0.471
2	rs1567420	162475601	C	T	0.1166	ADD	546	1.746	5.3 X 10-5	Imputed	0.825
2	rs1567421	162475617	T	G	0.1166	ADD	546	1.746	5.3 X 10-5	Imputed	0.825
2	rs16845945	162480684	T	C	0.1166	ADD	546	1.746	5.3 X 10-5	Imputed	0.822
2	rs72873624	162481453	A	G	0.1166	ADD	546	1.746	5.3 X 10-5	Imputed	0.826
11	rs536830	30030436	C	A	0.05464	ADD	546	2.455	5.43 X 10-5	Imputed	0.865
7	rs138268126	52010211	A	G	0.05738	ADD	546	2.263	5.46 X 10-5	Imputed	0.608
2	rs11675150	186023261	T	C	0.4973	ADD	546	-1.062	5.65 X 10-5	ImmunoChip	1
2	rs55673043	186016164	T	G	0.4973	ADD	546	-1.062	5.65 X 10-5	ImmunoChip	1
2	rs55943397	186016192	G	A	0.4973	ADD	546	-1.062	5.65 X 10-5	Imputed	1
2	rs62198551	186015718	A	G	0.4973	ADD	546	-1.062	5.65 X 10-5	ImmunoChip	1
2	rs72896988	186025072	T	A	0.4973	ADD	546	-1.062	5.65 X 10-5	Imputed	1
2	rs62187563	162354653	A	G	0.1812	ADD	546	1.349	5.66 X 10-5	Imputed	0.792
2	rs4344969	134803134	A	G	0.388	ADD	546	1.331	5.77 X 10-5	Imputed	0.448
2	rs16845960	162501613	G	A	0.1148	ADD	546	1.745	5.8 X 10-5	Imputed	0.818
2	rs55925603	162497210	A	G	0.1148	ADD	546	1.745	5.8 X 10-5	Imputed	0.822
2	rs56260047	162497225	T	G	0.1148	ADD	546	1.745	5.8 X 10-5	Imputed	0.822
2	rs56405014	162497603	T	C	0.1148	ADD	546	1.745	5.8 X 10-5	Imputed	0.818
2	rs62188961	162495399	G	A	0.1148	ADD	546	1.745	5.8 X 10-5	Imputed	0.824
2	rs72873645	162495047	A	G	0.1148	ADD	546	1.745	5.8 X 10-5	Imputed	0.824
2	rs13419921	141049304	C	G	0.3379	ADD	546	1.287	5.97 X 10-5	Imputed	0.861
2	rs150892753	41528951	C	A	0.3251	ADD	546	1.252	6 X 10-5	Imputed	0.829
10	rs10509103	61247710	G	A	0.4745	ADD	546	-1.103	6.07 X 10-5	Imputed	0.555
2	rs139302533	162363930	A	G	0.1248	ADD	546	1.671	6.26 X 10-5	Imputed	0.719
2	rs148468804	162371597	T	C	0.1248	ADD	546	1.671	6.26 X 10-5	Imputed	0.719
2	rs34006307	162369959	T	C	0.1248	ADD	546	1.671	6.26 X 10-5	Imputed	0.719
2	rs60824222	162368719	C	A	0.1248	ADD	546	1.671	6.26 X 10-5	Imputed	0.719
2	rs62187565	162360575	C	T	0.1248	ADD	546	1.671	6.26 X 10-5	Imputed	0.718
2	rs62187567	162363066	A	G	0.1248	ADD	546	1.671	6.26 X 10-5	Imputed	0.719
2	rs62187569	162373517	G	A	0.1248	ADD	546	1.671	6.26 X 10-5	Imputed	0.719
2	rs62187570	162373899	G	C	0.1248	ADD	546	1.671	6.26 X 10-5	Imputed	0.719
2	rs62187571	162374319	G	A	0.1248	ADD	546	1.671	6.26 X 10-5	Imputed	0.719
10	rs140226153	61080620	T	G	0.06011	ADD	546	2.296	6.58 X 10-5	Imputed	0.755
10	rs191672193	61086288	T	C	0.06011	ADD	546	2.296	6.58 X 10-5	Imputed	0.765
4	rs191427177	13844598	C	G	0.08743	ADD	546	2.026	6.64 X 10-5	Imputed	0.625
1	rs2477720	117605444	A	G	0.48	ADD	546	-1.133	6.7 X 10-5	Imputed	0.827
13	rs111916027	42626166	G	C	0.3379	ADD	546	1.07	6.76 X 10-5	Imputed	0.758
10	rs111744536	61057633	T	C	0.06648	ADD	546	2.202	6.99 X 10-5	Imputed	0.745
2	rs62188962	162495463	G	A	0.1138	ADD	546	1.729	7.03 X 10-5	Imputed	0.793
2	rs62188963	162495465	G	A	0.1138	ADD	546	1.729	7.03 X 10-5	Imputed	0.792
2	rs76220469	162495461	A	G	0.1138	ADD	546	1.729	7.03 X 10-5	Imputed	0.793
13	rs115817543	42635518	T	C	0.3333	ADD	546	1.064	7.05 X 10-5	Imputed	0.806
10	rs12243559	61539781	A	G	0.07923	ADD	546	1.608	7.06 X 10-5	Imputed	0.857
10	rs882896	61540166	T	A	0.07923	ADD	546	1.608	7.06 X 10-5	Imputed	0.861
2	rs61391514	4116845	G	C	0.2368	ADD	546	1.509	7.07 X 10-5	Imputed	0.41
17	rs55678694	37016782	C	A	0.1503	ADD	546	1.417	7.24 X 10-5	Imputed	0.77
6	rs9267655	31841055	A	G	0.1384	ADD	546	1.574	7.26 X 10-5	Imputed	0.901
10	rs2186149	53621449	C	T	0.09016	ADD	546	1.687	7.35 X 10-5	Imputed	0.779
2	rs58627659	162250910	T	C	0.1621	ADD	546	1.524	7.36 X 10-5	Imputed	0.679
2	rs72835346	50737716	T	C	0.0592	ADD	546	2.378	7.46 X 10-5	Imputed	0.497
4	rs10033546	27186977	C	A	0.07559	ADD	546	2.13	7.46 X 10-5	Imputed	0.743
4	rs987782	45825519	G	A	0.2322	ADD	546	1.445	7.47 X 10-5	Imputed	0.48
9	rs10118375	28519666	G	A	0.08197	ADD	546	2.048	7.55 X 10-5	Imputed	0.523
9	rs10968635	28520056	C	T	0.08197	ADD	546	2.048	7.55 X 10-5	Imputed	0.523
4	rs12649065	45819849	T	A	0.2286	ADD	546	1.454	7.7 X 10-5	Imputed	0.475
2	rs12467662	162386784	A	G	0.123	ADD	546	1.657	7.77 X 10-5	Imputed	0.736
2	rs12473583	162385435	G	A	0.123	ADD	546	1.657	7.77 X 10-5	Imputed	0.736
2	rs138827682	162393642	G	A	0.123	ADD	546	1.657	7.77 X 10-5	Imputed	0.736
2	rs140286889	162385151	A	G	0.123	ADD	546	1.657	7.77 X 10-5	Imputed	0.736
2	rs142620316	162398015	A	G	0.123	ADD	546	1.657	7.77 X 10-5	Imputed	0.736
2	rs2020027	162425878	A	G	0.123	ADD	546	1.657	7.77 X 10-5	Imputed	0.737
2	rs55650699	162388931	C	T	0.123	ADD	546	1.657	7.77 X 10-5	Imputed	0.736
2	rs55893794	162418751	A	G	0.123	ADD	546	1.657	7.77 X 10-5	Imputed	0.736
2	rs55999219	162421361	A	G	0.123	ADD	546	1.657	7.77 X 10-5	Imputed	0.732
2	rs56100249	162415157	C	T	0.123	ADD	546	1.657	7.77 X 10-5	Imputed	0.732
2	rs56145818	162403778	A	G	0.123	ADD	546	1.657	7.77 X 10-5	Imputed	0.736
2	rs57464189	162419312	A	G	0.123	ADD	546	1.657	7.77 X 10-5	Imputed	0.736
2	rs57840078	162402459	G	T	0.123	ADD	546	1.657	7.77 X 10-5	Imputed	0.725
2	rs60495163	162408807	T	C	0.123	ADD	546	1.657	7.77 X 10-5	Imputed	0.736
2	rs62187573	162378064	A	G	0.123	ADD	546	1.657	7.77 X 10-5	Imputed	0.721
2	rs62187574	162382776	C	T	0.123	ADD	546	1.657	7.77 X 10-5	Imputed	0.736
2	rs62187575	162384650	G	A	0.123	ADD	546	1.657	7.77 X 10-5	Imputed	0.736
2	rs62187595	162397457	A	C	0.123	ADD	546	1.657	7.77 X 10-5	Imputed	0.736
2	rs62187597	162398263	T	A	0.123	ADD	546	1.657	7.77 X 10-5	Imputed	0.736
2	rs62187603	162422517	A	G	0.123	ADD	546	1.657	7.77 X 10-5	Imputed	0.737
2	rs62187604	162423676	G	A	0.123	ADD	546	1.657	7.77 X 10-5	Imputed	0.737
2	rs72870226	162420429	C	T	0.123	ADD	546	1.657	7.77 X 10-5	Imputed	0.736
18	rs11082421	42692128	A	G	0.1321	ADD	546	1.528	7.85 X 10-5	Imputed	0.747
6	rs9503715	3709200	T	A	0.2377	ADD	546	1.53	7.88 X 10-5	Imputed	0.401
6	rs2326352	3716830	C	G	0.2887	ADD	546	1.358	7.92 X 10-5	Imputed	0.444
2	rs12464282	162448855	T	C	0.1175	ADD	546	1.701	8.06 X 10-5	Imputed	0.774
2	rs12465645	162437639	G	A	0.1175	ADD	546	1.701	8.06 X 10-5	Imputed	0.772
2	rs12465734	162437859	G	A	0.1175	ADD	546	1.701	8.06 X 10-5	Imputed	0.772
2	rs145549865	162446607	G	A	0.1175	ADD	546	1.701	8.06 X 10-5	Imputed	0.777
2	rs1515182	162436934	G	A	0.1175	ADD	546	1.701	8.06 X 10-5	Imputed	0.771
2	rs188317560	162442053	G	A	0.1175	ADD	546	1.701	8.06 X 10-5	Imputed	0.772
2	rs2175142	162450124	C	T	0.1175	ADD	546	1.701	8.06 X 10-5	Imputed	0.776
2	rs2389549	162462209	C	T	0.1175	ADD	546	1.701	8.06 X 10-5	Imputed	0.777
2	rs35974891	162452459	A	G	0.1175	ADD	546	1.701	8.06 X 10-5	Imputed	0.774
2	rs55782047	162440255	C	A	0.1175	ADD	546	1.701	8.06 X 10-5	Imputed	0.774
2	rs55821334	162452014	G	A	0.1175	ADD	546	1.701	8.06 X 10-5	Imputed	0.774
2	rs56094729	162464835	T	C	0.1175	ADD	546	1.701	8.06 X 10-5	Imputed	0.773
2	rs56153413	162440079	T	G	0.1175	ADD	546	1.701	8.06 X 10-5	Imputed	0.774
2	rs56407015	162455625	A	G	0.1175	ADD	546	1.701	8.06 X 10-5	Imputed	0.777
2	rs62187614	162436285	G	C	0.1175	ADD	546	1.701	8.06 X 10-5	Imputed	0.767
2	rs62187646	162445488	C	T	0.1175	ADD	546	1.701	8.06 X 10-5	Imputed	0.777
2	rs62187647	162446018	T	C	0.1175	ADD	546	1.701	8.06 X 10-5	Imputed	0.774
2	rs62187652	162468033	G	C	0.1175	ADD	546	1.701	8.06 X 10-5	Imputed	0.782
2	rs62187653	162469128	C	T	0.1175	ADD	546	1.701	8.06 X 10-5	Imputed	0.789
2	rs72870248	162435849	A	G	0.1175	ADD	546	1.701	8.06 X 10-5	Imputed	0.766
2	rs72873603	162469665	T	C	0.1175	ADD	546	1.701	8.06 X 10-5	Imputed	0.795
2	rs72873607	162471174	A	G	0.1175	ADD	546	1.701	8.06 X 10-5	Imputed	0.812
2	rs12469302	162433831	T	G	0.1211	ADD	546	1.659	8.14 X 10-5	Imputed	0.747
2	rs12473497	162433766	C	T	0.1211	ADD	546	1.659	8.14 X 10-5	Imputed	0.747
2	rs62187612	162432494	G	A	0.1211	ADD	546	1.659	8.14 X 10-5	Imputed	0.74
2	rs62187613	162434474	C	T	0.1211	ADD	546	1.659	8.14 X 10-5	Imputed	0.749
2	rs4148218	44099582	A	G	0.174	ADD	546	1.36	8.2 X 10-5	Imputed	0.824
2	rs10490568	162252421	G	A	0.1603	ADD	546	1.518	8.3 X 10-5	Imputed	0.767
2	rs112335657	162190437	G	T	0.1603	ADD	546	1.518	8.3 X 10-5	Imputed	0.787
2	rs12463483	162252619	T	G	0.1603	ADD	546	1.518	8.3 X 10-5	Imputed	0.772
2	rs12463535	162252899	G	C	0.1603	ADD	546	1.518	8.3 X 10-5	Imputed	0.772
2	rs12467117	162226315	T	G	0.1603	ADD	546	1.518	8.3 X 10-5	Imputed	0.772
2	rs12471336	162265189	T	G	0.1603	ADD	546	1.518	8.3 X 10-5	Imputed	0.766
2	rs1559629	162270728	T	C	0.1603	ADD	546	1.518	8.3 X 10-5	Imputed	0.769
2	rs16845807	162247399	G	A	0.1603	ADD	546	1.518	8.3 X 10-5	Imputed	0.772
2	rs16845830	162258195	G	A	0.1603	ADD	546	1.518	8.3 X 10-5	Imputed	0.772
2	rs2194726	162245832	T	C	0.1603	ADD	546	1.518	8.3 X 10-5	Imputed	0.772
2	rs2194727	162245871	G	C	0.1603	ADD	546	1.518	8.3 X 10-5	Imputed	0.772
2	rs2303319	162224664	T	C	0.1603	ADD	546	1.518	8.3 X 10-5	Imputed	0.767
2	rs3769959	162249206	G	A	0.1603	ADD	546	1.518	8.3 X 10-5	Imputed	0.772
2	rs3769964	162207346	T	C	0.1603	ADD	546	1.518	8.3 X 10-5	Imputed	0.778
2	rs57090160	162179197	A	G	0.1603	ADD	546	1.518	8.3 X 10-5	Imputed	0.779
2	rs60767767	162185558	T	C	0.1603	ADD	546	1.518	8.3 X 10-5	Imputed	0.78
2	rs62188121	162232085	C	T	0.1603	ADD	546	1.518	8.3 X 10-5	Imputed	0.772
2	rs62188122	162240407	A	T	0.1603	ADD	546	1.518	8.3 X 10-5	Imputed	0.772
2	rs62188133	162253435	C	T	0.1603	ADD	546	1.518	8.3 X 10-5	Imputed	0.767
2	rs62188137	162257548	C	T	0.1603	ADD	546	1.518	8.3 X 10-5	Imputed	0.772
2	rs62188139	162269775	T	G	0.1603	ADD	546	1.518	8.3 X 10-5	Imputed	0.77
2	rs62188140	162269866	G	A	0.1603	ADD	546	1.518	8.3 X 10-5	Imputed	0.77
2	rs62194491	162205061	G	A	0.1603	ADD	546	1.518	8.3 X 10-5	Imputed	0.78
2	rs62194492	162215563	A	C	0.1603	ADD	546	1.518	8.3 X 10-5	Imputed	0.774
2	rs62194493	162218614	A	G	0.1603	ADD	546	1.518	8.3 X 10-5	Imputed	0.772
2	rs62197078	162182954	A	G	0.1603	ADD	546	1.518	8.3 X 10-5	Imputed	0.78
2	rs62197080	162193238	T	C	0.1603	ADD	546	1.518	8.3 X 10-5	Imputed	0.78
2	rs74733151	162251856	G	C	0.1603	ADD	546	1.518	8.3 X 10-5	Imputed	0.772
2	rs76063526	162230834	T	A	0.1603	ADD	546	1.518	8.3 X 10-5	Imputed	0.772
15	rs62024122	44580729	C	A	0.1475	ADD	546	-1.698	8.31 X 10-5	Imputed	0.473
2	rs3849355	162387714	G	A	0.1384	ADD	546	1.579	8.34 X 10-5	Imputed	0.737
2	rs4001644	162398867	A	C	0.1384	ADD	546	1.579	8.34 X 10-5	Imputed	0.737
2	rs4589776	162394112	G	C	0.1384	ADD	546	1.579	8.34 X 10-5	Imputed	0.738
2	rs4664427	162377889	C	T	0.1384	ADD	546	1.579	8.34 X 10-5	Imputed	0.73
2	rs6432688	162378656	C	G	0.1384	ADD	546	1.579	8.34 X 10-5	Imputed	0.733
2	rs7572645	162398278	A	G	0.1384	ADD	546	1.579	8.34 X 10-5	Imputed	0.737
2	rs7576745	162383106	T	C	0.1384	ADD	546	1.579	8.34 X 10-5	Imputed	0.736
2	rs7589304	162383293	A	G	0.1384	ADD	546	1.579	8.34 X 10-5	Imputed	0.736
2	rs77198442	162383668	A	G	0.1384	ADD	546	1.579	8.34 X 10-5	Imputed	0.736
2	rs77765713	162395587	C	T	0.1384	ADD	546	1.579	8.34 X 10-5	Imputed	0.714
4	rs4695180	46886345	G	A	0.05282	ADD	546	2.411	8.34 X 10-5	Imputed	0.774
22	rs11703064	17092185	C	G	0.3825	ADD	546	-1.006	8.42 X 10-5	Imputed	0.442
2	rs35206901	44097360	G	A	0.1776	ADD	546	1.345	8.54 X 10-5	Imputed	0.814
11	rs10894755	133739685	G	A	0.4235	ADD	546	-1.087	8.68 X 10-5	ImmunoChip	1
2	rs1354907	189588959	A	G	0.1758	ADD	546	-1.587	8.87 X 10-5	Imputed	0.61
11	rs6709	35829478	A	G	0.1721	ADD	546	1.466	8.93 X 10-5	Imputed	0.626
12	rs4761241	69571557	T	A	0.1284	ADD	546	1.58	9 X 10-5	Imputed	0.576
13	rs17062771	42642637	T	C	0.2842	ADD	546	1.03	9.09 X 10-5	GSA	0.846
2	rs12692638	162441486	C	T	0.1348	ADD	546	1.603	9.18 X 10-5	Imputed	0.77
2	rs2389548	162465110	G	C	0.1348	ADD	546	1.603	9.18 X 10-5	Imputed	0.772
2	rs971027	162444614	T	A	0.1348	ADD	546	1.603	9.18 X 10-5	Imputed	0.77
18	rs1450812	42698019	T	C	0.1311	ADD	546	1.516	9.39 X 10-5	Imputed	0.744
2	rs768836	162297663	T	C	0.1995	ADD	546	1.25	9.4 X 10-5	Imputed	0.863
1	rs12402335	115136095	A	T	0.09381	ADD	546	-1.822	9.63 X 10-5	Imputed	0.593
13	rs7319315	42619920	C	T	0.4727	ADD	546	-1.033	9.63 X 10-5	Imputed	0.745
2	rs1567419	162475508	A	G	0.1129	ADD	546	1.701	9.66 X 10-5	Imputed	0.731
18	rs4890519	42713146	T	G	0.1375	ADD	546	1.495	9.84 X 10-5	Imputed	0.714
10	rs188318833	61081454	A	G	0.05738	ADD	546	2.281	9.85 X 10-5	Imputed	0.765
15	rs56224969	88676794	T	C	0.09016	ADD	546	1.891	9.86 X 10-5	Imputed	0.622
22	rs5992971	18514671	T	C	0.3825	ADD	546	1.007	1 X 10-4	Imputed	0.726

## Sheet: Legend
CHR	Chromosome
SNP	SNP identifier
BP	Physical position (base-pair)
A1	Tested allele (Minor allele)
A2	Major allele
MAF	Minor allele frequency
TEST	ADD (additive effects of allele dosage)
NMISS	Number of non-missing individuals included in analysis
BETA	Regression coefficient (--linear). For the additive effects of SNPs, the direction of the regression coefficient represents the effect of each extra minor allele (i.e. a positive regression coefficient means that the minor allele increases risk/phenotype mean).
P	Asymptotic p-value for t-statistic
